# Supplementary material for: Energy transition and social justice: Do renewable energy levies have an impact on income distribution and energy poverty?
Source: Research Square preprint supplement (doi:10.21203/rs.3.rs-754301/v1), 2021-08-11
Supplement: Supplementary file 2 [file 7239c4a384de1cf45b609fb2.xlsx]

## Sheet: Description
Calculation sheet for The share of renewable energy in electricity consumption for EU27 and Germany
For the years 2003-2018
Energy transition and social justice: Do renewable energy levies have an impact on income distribution and energy poverty?
Jan Priesmann, Saskia Spiegelburg, Reinhard Madlener, Aaron Praktiknjo

## Sheet: Results EU27
Year	2003	2004	2005	2006	2007	2008	2009	2010	2011	2012	2013	2014	2015	2016	2017	2018
Share of RES in elec. consumption	0.145416	0.158665	0.163981	0.168772	0.176468	0.185424	0.20671	0.212954	0.233216	0.251531	0.268502	0.286766	0.296579	0.301591	0.310892	0.32183
Source	Own calculation1	SHort Assessment of Renewable Energy Sources (Summary results 2019)2
1see Excel Lookup
2Eurostat, 2021. SHARES 2019 summary results. https://ec.europa.eu/eurostat/web/energy/data/shares

## Sheet: Results DE
Year	2003	2004	2005	2006	2007	2008	2009	2010	2011	2012	2013	2014	2015	2016	2017	2018
Share of RES in elec. consumption1	0.077	0.094	0.103	0.116	0.143	0.152	0.164	0.17	0.204	0.235	0.251	0.274	0.315	0.316	0.36	0.378
1AGEE Stat, 2021. Zeitreihen zur Entwicklung der erneuerbaren Energien in Deutschland. https://www.erneuerbare-energien.de/EE/Navigation/DE/Service/Erneuerbare_Energien_in_Zahlen/Zeitreihen/zeitreihen.html

## Sheet: EU27 (2003)
Country	Share of RES in elec. Consumption1,2	Annual electricity consumption [GWh]3
Austria	0.559229	56765
Sweden	0.400361	132066
Portugal	0.36436	43803
Latvia	0.353814	5201
Denmark	0.232265	33134
Slovenia	0.231051	12203
Spain	0.222692	224266
Finland	0.217605	81772
France	0.129962	436999
Italy	0.127728	299788
Slovakia	0.120328	24257
Greece	0.0955408	50697
Germany	0.0792488	531751
Netherlands	0.0468589	103804
Ireland	0.0431044	23223
Czechia	0.0280555	54807
Lithuania	0.0277638	8032
Luxembourg	0.0231032	6181.23
Belgium	0.0183899	82065
Poland	0.0159044	111462
Hungary	0.0088851	34077
Estonia	0.00484437	6013
Cyprus	0	3672
Malta	0	1806
Bulgaria	0.0808273	26476
Romania	0.285135	44459
Croatia	0.353211	13384
1EEA, 2009. Targets for 2010 and share of electricity consumption met by renewable energy sources in 2003 for the EU-25. https://www.eea.europa.eu/data-and-maps/figures/targets-for-2010-and-share-of-electricity-consumption-met-by-renewable-energy-sources-in-2003-for-the-eu-25
2Own calculations (see Excel Lookup)
3Eurostat, 2021. Supply, transformation and consumption of electricity [NRG_CB_E__custom_1165021]. https://ec.europa.eu/eurostat/databrowser/view/NRG_CB_E__custom_1165021/default/table?lang=en

## Sheet: BG (2003)
Bulgaria
Year	2003	2004	2005	2006	2007	2008
Share of RES in elec. Consumption1,2	0.0808273	0.0835771	0.0866604	0.0872967	0.0889934	0.0954377
Relative change to previous year	-	-	1.03689	1.00734	1.01944	1.07241
Annual electricity consumption [GWh]3	26476	-	-	-	-	-
1based on 2004-2008 values from SHARES, see Excel Lookup
2Eurostat, 2021. SHARES 2019 summary results. https://ec.europa.eu/eurostat/web/energy/data/shares
3Eurostat, 2021. Supply, transformation and consumption of electricity [NRG_CB_E__custom_1165021]. https://ec.europa.eu/eurostat/databrowser/view/NRG_CB_E__custom_1165021/default/table?lang=en

## Sheet: RO (2003)
Romania
Year	2003	2004	2005	2006	2007	2008
Share of RES in elec. Consumption1,2	0.285135	0.284274	0.287748	0.280542	0.281079	0.280753
Relative change to previous year	-	-	1.01222	0.974958	1.00191	0.99884
Annual electricity consumption [GWh]3	44459	-	-	-	-	-
1based on 2004-2008 values from SHARES, see Excel Lookup
2Eurostat, 2021. SHARES 2019 summary results. https://ec.europa.eu/eurostat/web/energy/data/shares
3Eurostat, 2021. Supply, transformation and consumption of electricity [NRG_CB_E__custom_1165021]. https://ec.europa.eu/eurostat/databrowser/view/NRG_CB_E__custom_1165021/default/table?lang=en

## Sheet: HR (2003)
Croatia
Year	2003	2004	2005	2006	2007	2008
Share of RES in elec. Consumption1,2	0.353211	0.350266	0.35184	0.348182	0.339758	0.338653
Relative change to previous year	-	-	1.00449	0.989601	0.975806	0.99675
Annual electricity consumption [GWh]3	13384	-	-	-	-	-
1based on 2004-2008 values from SHARES, see Excel Lookup
2Eurostat, 2021. SHARES 2019 summary results. https://ec.europa.eu/eurostat/web/energy/data/shares
3Eurostat, 2021. Supply, transformation and consumption of electricity [NRG_CB_E__custom_1165021]. https://ec.europa.eu/eurostat/databrowser/view/NRG_CB_E__custom_1165021/default/table?lang=en
